# Supplementary material for: Application of Cornelian Cherry Iridoid-Polyphenolic Fraction and Loganic Acid to Reduce Intraocular Pressure
Source: Hindawi journal article supplement (doi:10.1155/2015/939402), 2015-01-01

<sup>1</sup>H spectrum of isolated loganic acid:

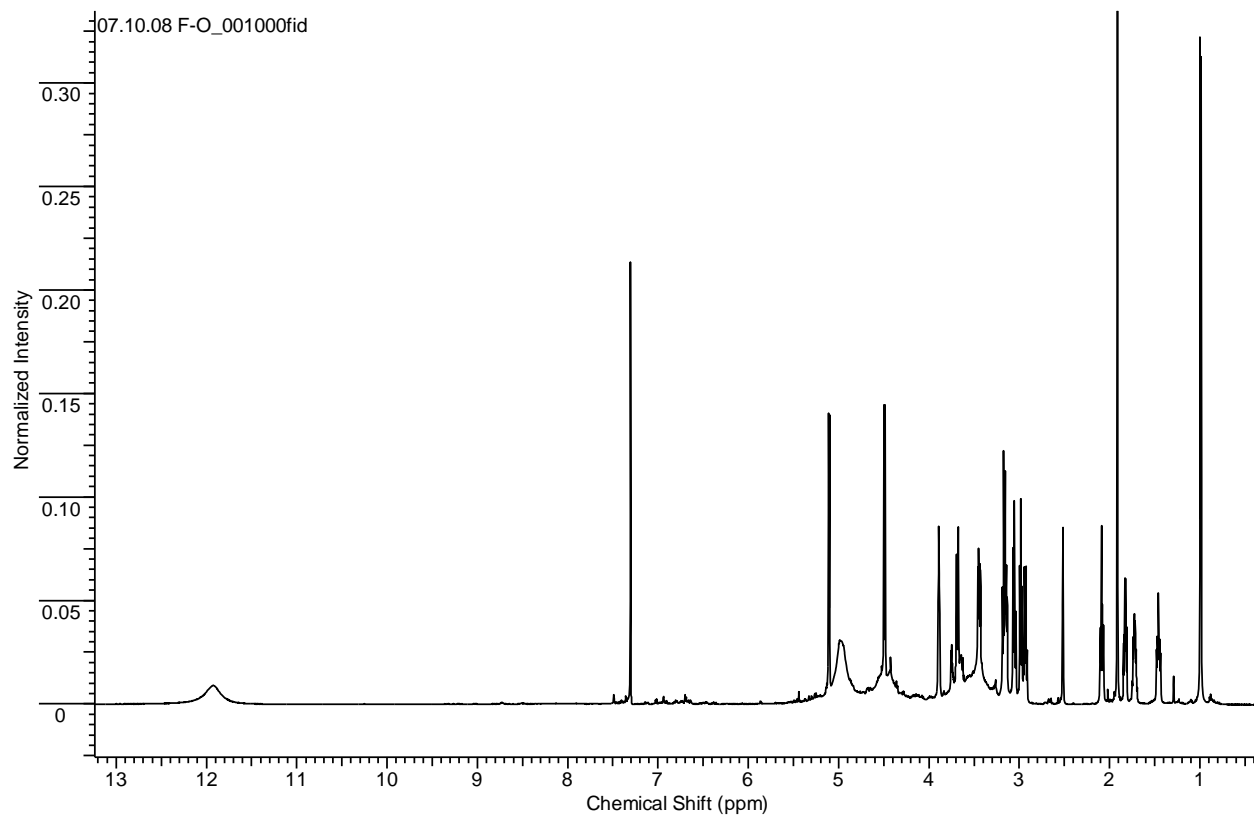

<sup>13</sup>C spectrum of loganic acid:

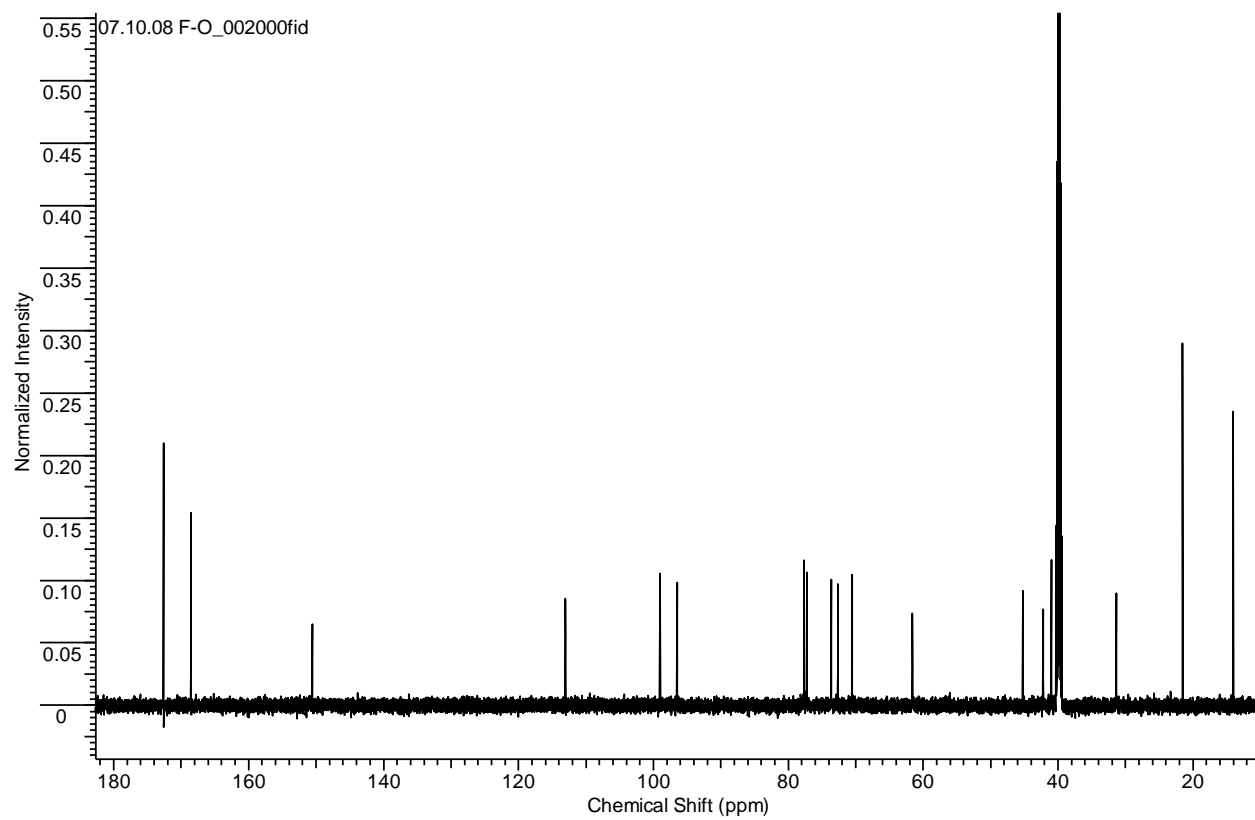

HSQC spectrum of loganic acid:

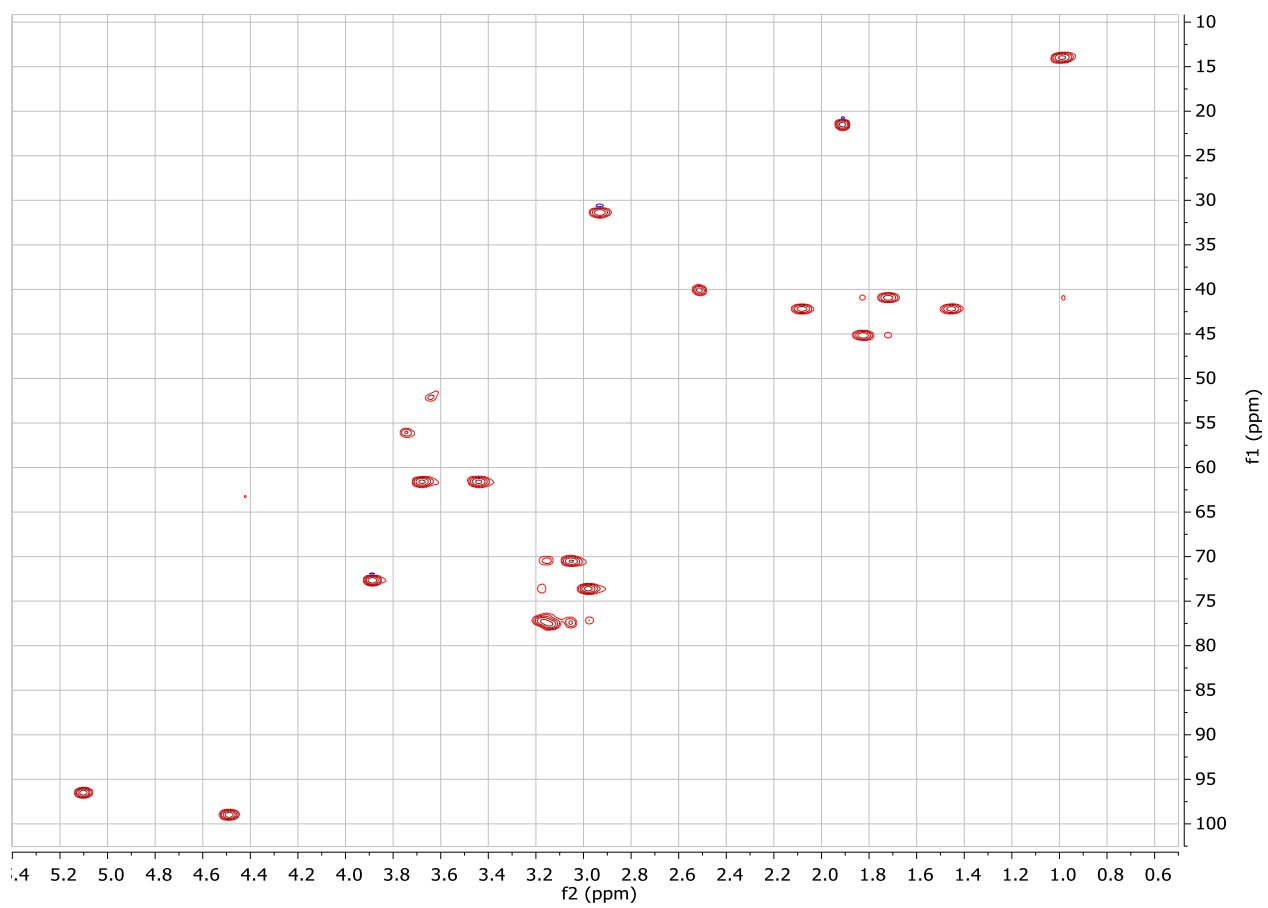

HMBC of loganic acid:

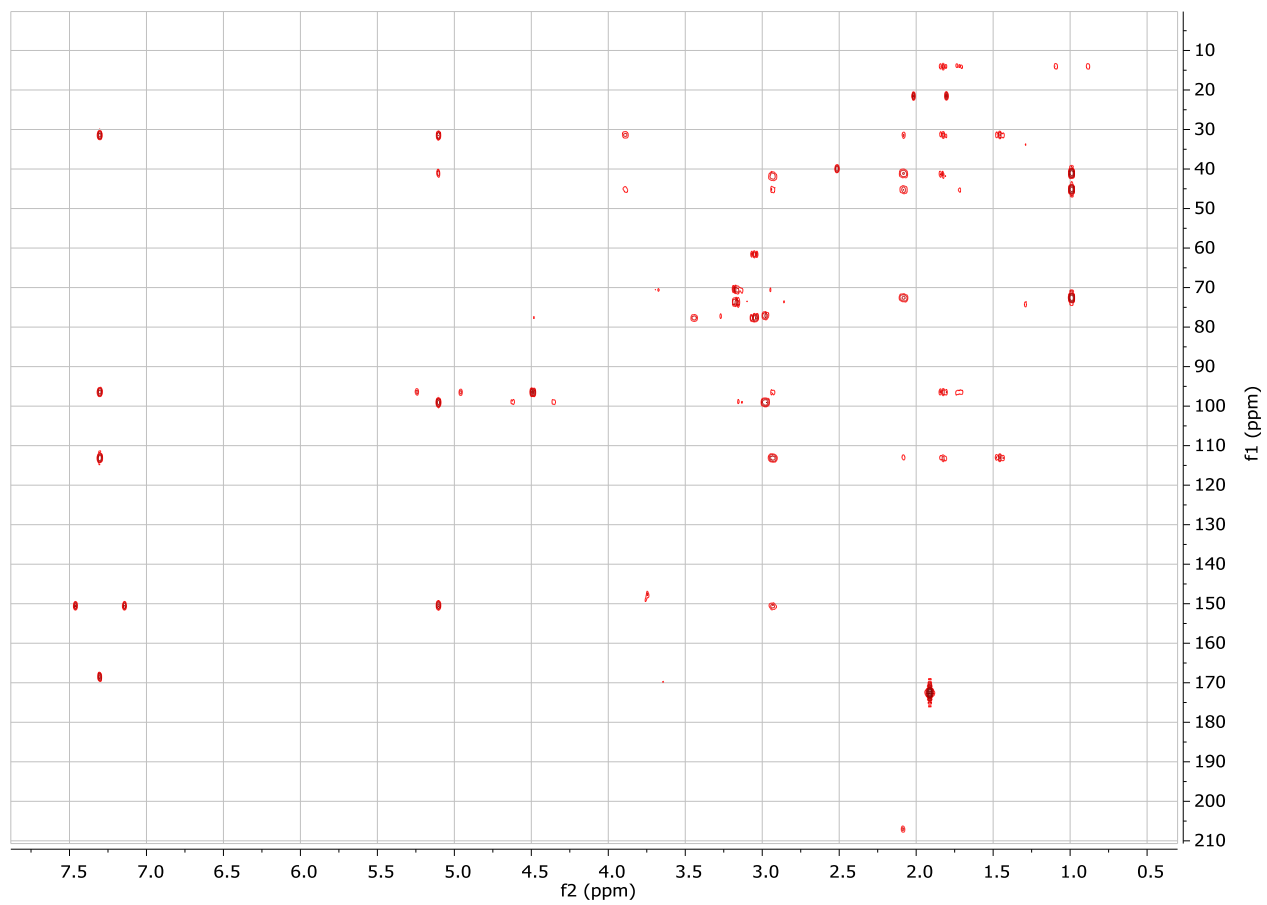

ROESY spectrum of loganic acid:

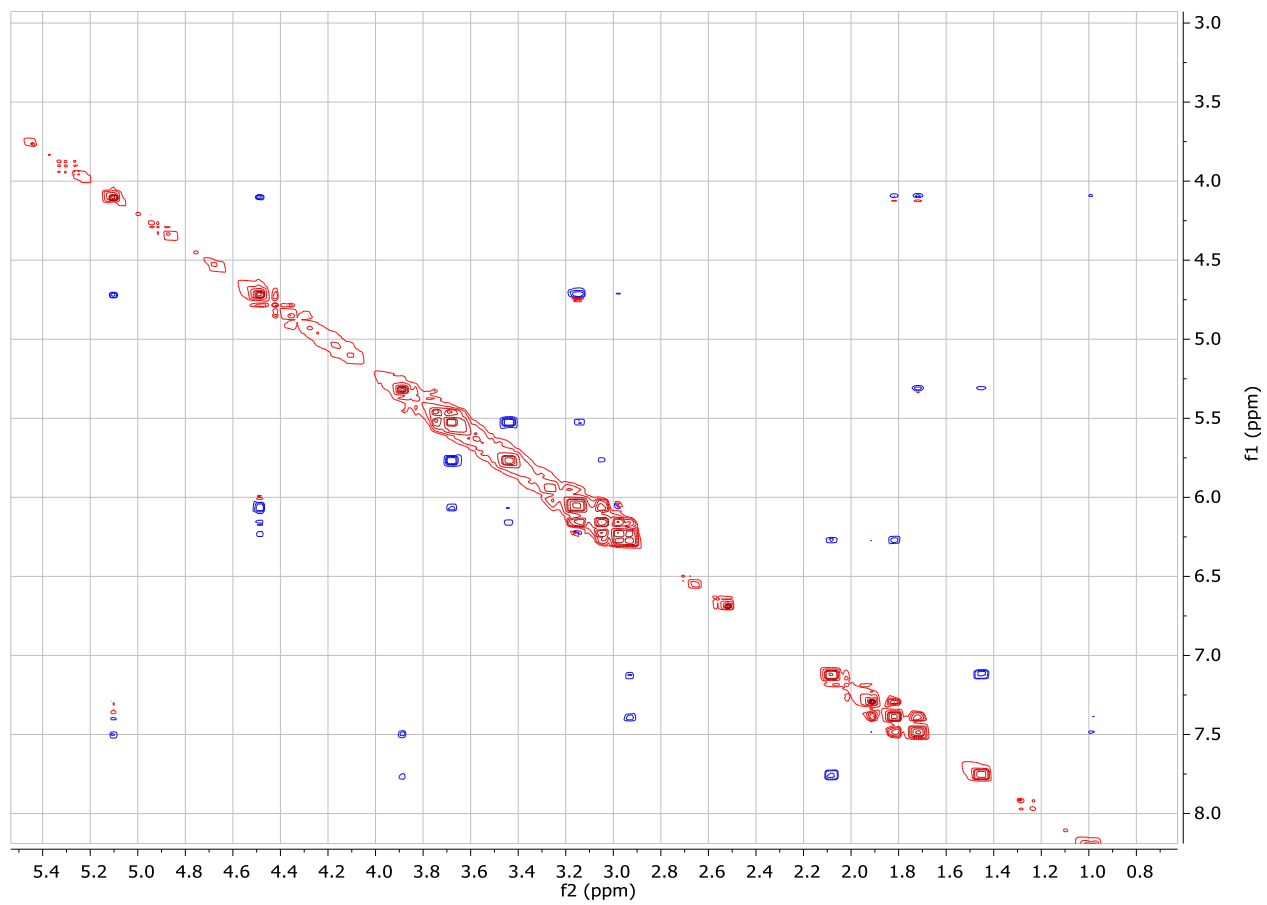

Supplement: f1 [file 939402.f1.zip]
